# Supplementary material
Source: MDPI journal article supplement (https://www.mdpi.com/2297-8739/11/5/157)
Supplement: s1 [file s1]

# Supplementary material

## Characterization and quantitation of anthocyanins of the pigmented tea cultivar TRI 2043 (*Camellia sinensis* L.) from Sri Lanka

Philipp Hopfstock <sup>1</sup>, P.A. Nimal Punyasiri <sup>2</sup>, Mats Kiene <sup>1</sup>, J. Dananjaya Kottawa-Arachchi <sup>3</sup>, Recep Gök <sup>1</sup> and Peter Winterhalter <sup>1\*</sup>

<sup>1</sup> Institute of Food Chemistry, Technische Universität Braunschweig, Schleinitzstrasse 20, 38106 Braunschweig, Germany

<sup>2</sup> University of Colombo, Institute of Biochemistry, Molecular Biology and Biotechnology, Colombo 00300, Sri Lanka.

<sup>3</sup> Plant Breeding Division, Tea Research Institute of Sri Lanka, St. Coombs Estate, Talawakelle, Sri Lanka

\* Correspondence: p.winterhalter@tu-braunschweig.de

### Section S1: MeOH/H<sub>2</sub>O extract of TRI2043 (Figure S1).

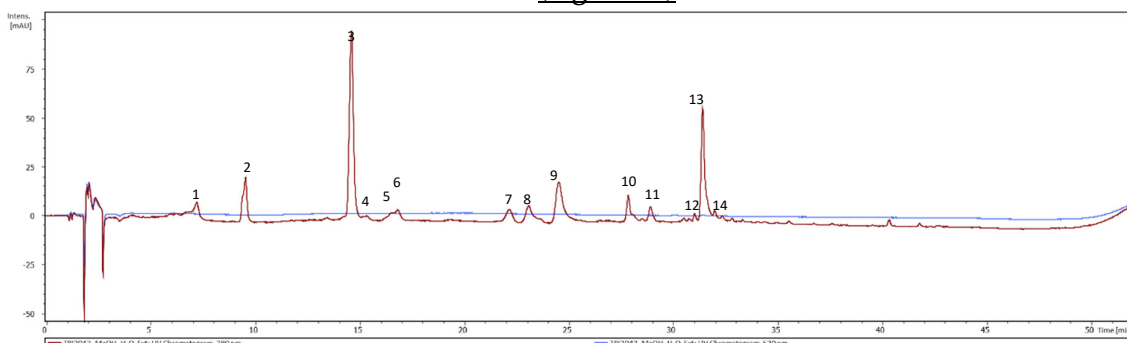

**Figure S1.** HPLC chromatogram at 280 nm (red line) and 520 nm (blue line) of a MeOH/H<sub>2</sub>O TRI2043 extract normalized on the highest peak. The *m/z* of the numbered peaks is shown in table S 1.

**Table S1.** Summary of HPLC-DAD-MS/MS measurement of a MeOH/H<sub>2</sub>O TRI2043 extract (cf. Fig. S 1). Annotation via *m/z* and fragmentation pattern according to the literature [1–3].

| Peak # | Compound                           | [M-H] <sup>-</sup> | MS/MS       |
|--------|------------------------------------|--------------------|-------------|
| 1      | 5-galloylquinic acid               | 343                | 191         |
| 2      | theobromine                        | 181 <sup>a</sup>   | na          |
| 3      | caffeine                           | 195 <sup>a</sup>   | 154/138     |
| 4      | catechin                           | 289                | 245/205     |
| 5      | 5-caffeoylquinic acid              | 353                | 191         |
| 6      | strictinin                         | 633                | 463/301     |
| 7      | epicatechin                        | 289                | 245/205     |
| 8      | 4- <i>p</i> -cumaroylquinic acid   | 337                | 173         |
| 9      | (epi)gallocatechin-3-gallate       | 457                | 331/169     |
| 10     | (epi)catechin-(epi)gallocatechin   | 729                | 559/407/287 |
| 11     | myricetin-3- <i>O</i> -hexoside    | 479                | 317/316     |
| 12     | rutin                              | 609                | 301         |
| 13     | (epi)catechin-3- <i>O</i> -gallate | 441                | 289/245/193 |
| 14     | quercetin-hexoside                 | 463                | 301         |

<sup>a</sup>[M+H]<sup>+</sup>

Extract of TRI2043 after enrichment on Amberlite™ XAD7-HP and before membrane chromatography (**Figure S2**).

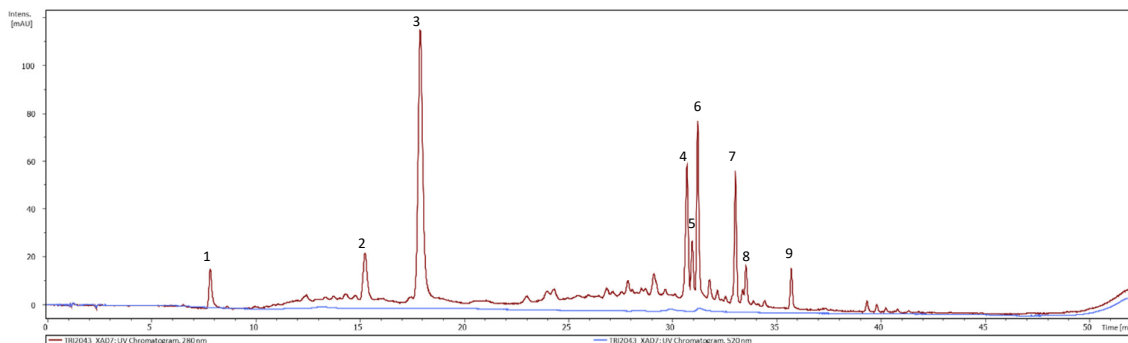

**Figure S2.** HPLC chromatogram at 280 nm (red line) and 520 nm (blue line) of an Amberlite™ XAD7-HP TRI2043 extract normalized on the highest peak. The  $m/z$  of the numbered peaks is shown in table S 2.

**Table S2.** Summary of HPLC-DAD-MS/MS measurement of an Amberlite™ XAD7-HP TRI2043 extract (cf. Fig. S 2). Annotation via  $m/z$  and fragmentation pattern according to the literature [1–3].

| Peak # | Compound                                     | [M-H] <sup>-</sup> | MS/MS       |
|--------|----------------------------------------------|--------------------|-------------|
| 1      | 5-galloylquinic acid                         | 343                | 191         |
| 2      | (epi)gallocatechin-(epi)gallocatechingallate | 761                | 609/423/305 |
| 3      | strictinin                                   | 633                | 463/301     |
| 4      | quercetin-rhamnose-hexose-rhamnose           | 755                | 609/301     |
| 5      | quercetin-rhamnosylgalactoside/rutin         | 609                | 301         |
| 6      | quercetin-rhamnosylgalactoside/rutin         | 609                | 301         |
| 7      | kaempferol-rhamnose-hexose-rhamnose          | 739                | 593/285     |
| 8      | kaempferol-rutinosid                         | 593                | 285         |
| 9      | unknown kaempferol species                   | 781                | 285         |

**Extract of TRI2043 after membrane chromatography (Figure S3).**

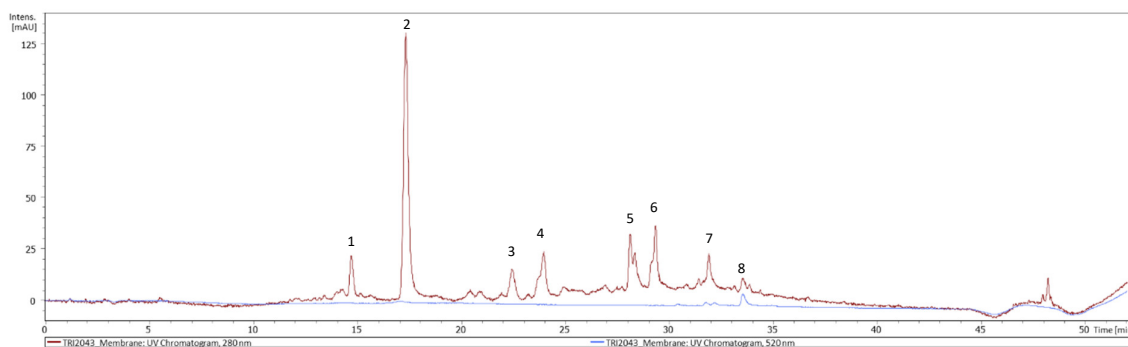

**Figure S3.** HPLC chromatogram at 280 nm (red line) and 520 nm (blue line) of a membrane chromatography TRI2043 extract normalized on the highest peak. The  $m/z$  of the numbered peaks is shown in table S 3.

**Table S3.** Summary of HPLC-DAD-MS/MS measurement of a membrane chromatography TRI2043 extract (cf. Fig. S 3). Annotation via  $m/z$  and fragmentation pattern according to the literature [1–3].

| Peak # | Compound                                                          | [M-H] <sup>-</sup> | MS/MS       |
|--------|-------------------------------------------------------------------|--------------------|-------------|
| 1      | (epi)gallocatechin-(epi)gallocatechingallate                      | 761                | 609/423/305 |
| 2      | strictinin                                                        | 633                | 463/301     |
| 3      | (epi)catechingallate-(epi)gallocatechin                           | 745                | 423/305     |
| 4      | (epi)catechingallate-(epi)gallocatechin                           | 745                | 407/289     |
| 5      | (epi)catechin-(epi)gallocatechin                                  | 729                | 407/289     |
| 6      | strictinin-gallate                                                | 785                | 633/301     |
| 7      | Rutin                                                             | 609                | 301         |
| 8      | cyanidin-3-O-β-D-(6-(E)-p-oumaroyl)galactopyranoside <sup>a</sup> | 595                | 287         |

<sup>a</sup>[M]<sup>+</sup>

## HPLC-DAD-MS/MS parameters

|                    |                                                                                                                                                                                                       |
|--------------------|-------------------------------------------------------------------------------------------------------------------------------------------------------------------------------------------------------|
| pump:              | Agilent 1100 G1312A Binary Pump (Waldbronn, D)                                                                                                                                                        |
| autosampler:       | Agilent 1200 G1321B ALS SL (Waldbronn, D)                                                                                                                                                             |
| detector:          | Agilent 1100 G1315B DAD (Waldbronn, D)                                                                                                                                                                |
| software:          | Bruker HyStar V. 3.2 (Bremen, D)                                                                                                                                                                      |
| spectrometer:      | Bruker HCT Ultra Ion Trap (Bremen, D)                                                                                                                                                                 |
| ionization:        | electrospray                                                                                                                                                                                          |
| polarity:          | alternating                                                                                                                                                                                           |
| scan range:        | 100 – 1500 <i>m/z</i>                                                                                                                                                                                 |
| capillary voltage: | 3000 V                                                                                                                                                                                                |
| nebulizer:         | 50 psi                                                                                                                                                                                                |
| dry Gas:           | nitrogen 10 L/min                                                                                                                                                                                     |
| dry Temp:          | 365 °C                                                                                                                                                                                                |
| injection volume:  | 5 µL                                                                                                                                                                                                  |
| column Temp:       | 25 °C                                                                                                                                                                                                 |
| column:            | Luna C18(2) 3µm, 150 mm × 2,1 mm, Phenomenex (Aschaffenburg, D)                                                                                                                                       |
| flow rate:         | 0.25 mL/min                                                                                                                                                                                           |
| solvents:          | A: H <sub>2</sub> O (Nanopure®, Werner GmbH, Leverkusen, Germany) + 1 % FA (LC-MS grade, Fisher Scientific, Loughborough, U.K.) B: ACN (LC-MS grade, Honeywell Speciality Chemicals, Seelze, Germany) |
| gradient:          | 0 min 3 % B, 5 min 10 % B, 15 min 10 % B, 40 min 32.5 % B, 43 min 95 % B, 45 min 95 % B, 45.1 min 3 % B, 52 min 3 % B.                                                                                |
| wavelength:        | λ 200 – 700 nm                                                                                                                                                                                        |

Section S2: External calibrations, ranging from 0.5–50 mg/L.

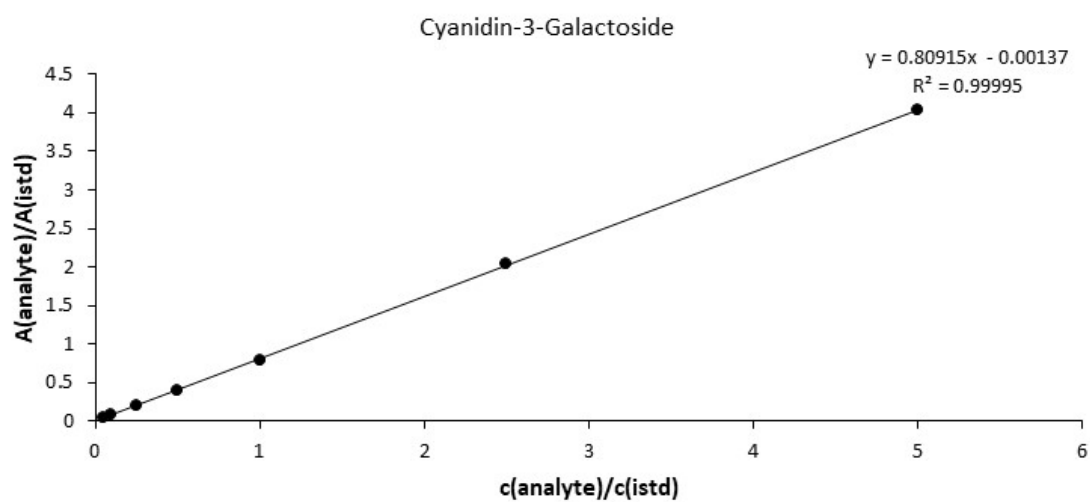

**Figure S4.** External calibration curve of cyanidin-3-O- $\beta$ -D-galactoside with cyanidin-3-O- $\beta$ -D-glucoside as internal standard  $c = 10$  mg/L.

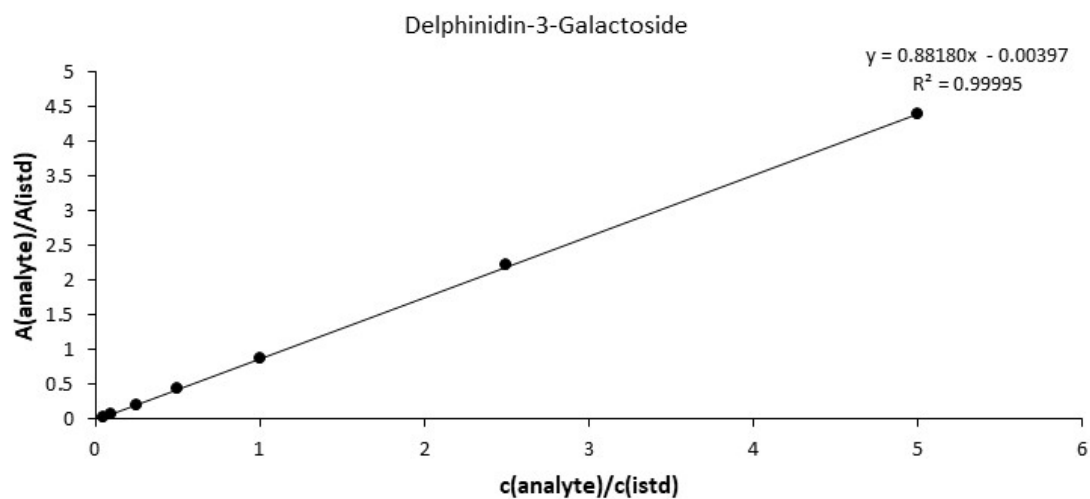

**Figure S5.** External calibration curve of delphinidin-3-O- $\beta$ -D-galactoside with cyanidin-3-O- $\beta$ -D-glucoside as internal standard  $c = 10$  mg/L.

## References

1. Del Rio, D.; Stewart, A.J.; Mullen, W.; Burns, J.; Lean, M.E.J.; Brighenti, F.; Crozier, A. HPLC-MSn analysis of phenolic compounds and purine alkaloids in green and black tea. *J. Agric. Food Chem.* **2004**, *52*, 2807–2815, doi:10.1021/jf0354848.
2. Dou, J.; Lee, V.S.Y.; Tzen, J.T.C.; Lee, M.-R. Identification and comparison of phenolic compounds in the preparation of oolong tea manufactured by semifermentation and drying processes. *J. Agric. Food Chem.* **2007**, *55*, 7462–7468, doi:10.1021/jf0718603.
3. Jiang, X.; Liu, Y.; Li, W.; Zhao, L.; Meng, F.; Wang, Y.; Tan, H.; Yang, H.; Wei, C.; Wan, X.; et al. Tissue-specific, development-dependent phenolic compounds accumulation profile and gene expression pattern in tea plant *Camellia sinensis*. *PLoS One* **2013**, *8*, e62315, doi:10.1371/journal.pone.0062315.
